# Supplementary material for: Is the Timed Up and Go test a useful predictor of risk of falls in community dwelling older adults: a systematic review and meta- analysis
Source: Springer Nature journal article supplement (doi:10.1186/1471-2318-14-14), 2014-02-01

Proportion of studies with low, high or unclear Risk of BIAS

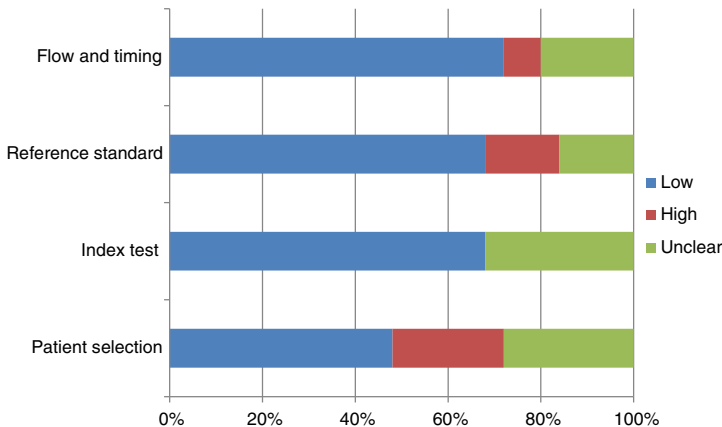

Proportion of studies with low, high, or unclear concerns regarding APPLICABILITY

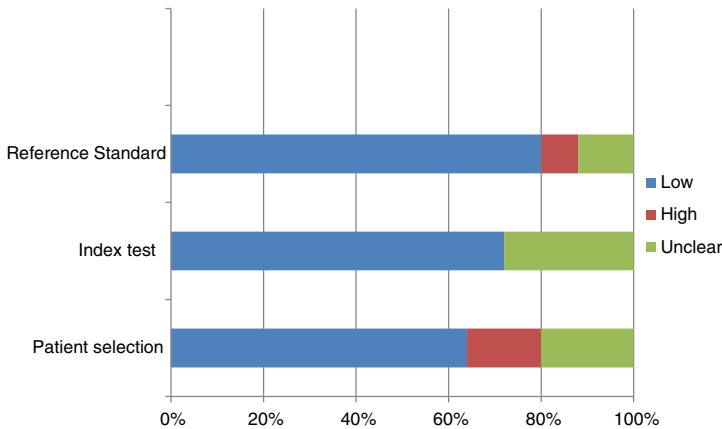

Supplement: 12877_2013_954_MOESM2_ESM.pdf [file 12877_2013_954_MOESM2_ESM.pdf]
