# Supplementary material for: Is the Timed Up and Go test a useful predictor of risk of falls in community dwelling older adults: a systematic review and meta- analysis
Source: Springer Nature journal article supplement (doi:10.1186/1471-2318-14-14), 2014-02-01
Supplement: 12877_2013_954_MOESM4_ESM.pdf [file 12877_2013_954_MOESM4_ESM.pdf]

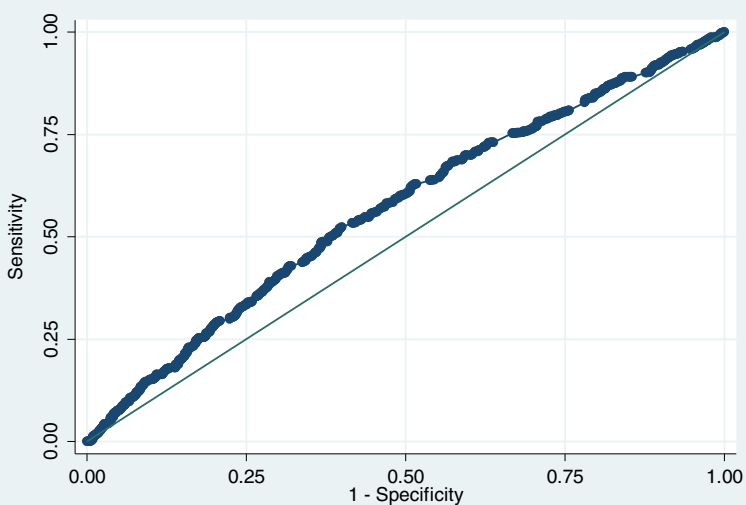

Area under ROC curve = 0.5688 95% CI 0.54-0.59
