# Supplementary figures and images for: Is the Timed Up and Go test a useful predictor of risk of falls in community dwelling older adults: a systematic review and meta- analysis
Source: Springer Nature journal article supplement (doi:10.1186/1471-2318-14-14), 2014-02-01

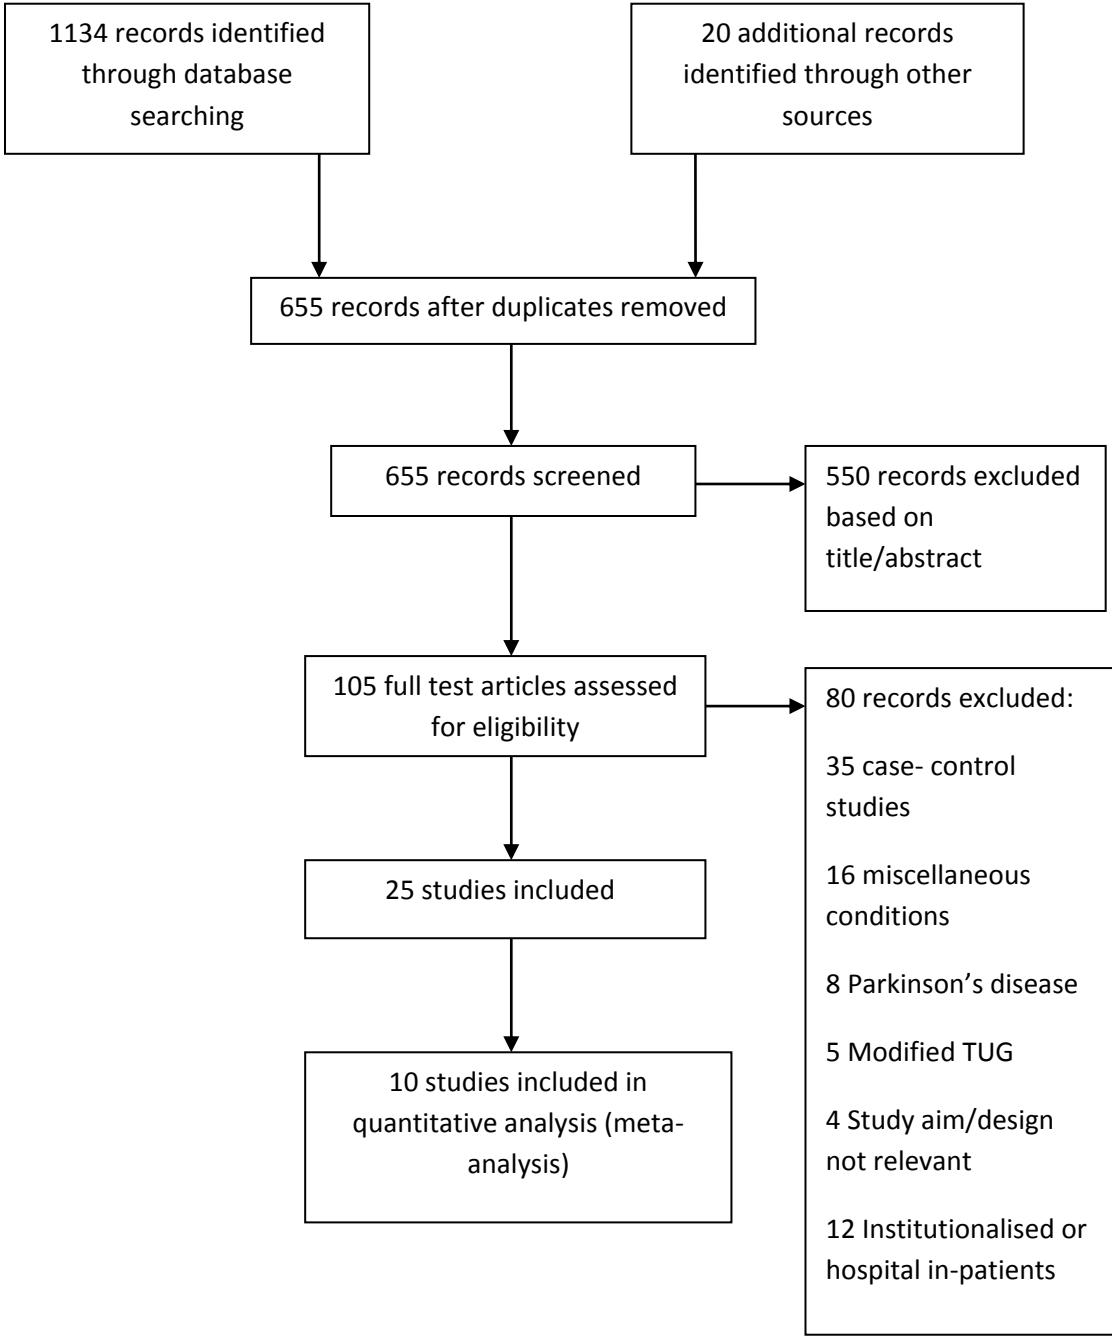

Supplement: 12877_2013_954_MOESM1_ESM.pdf [file 12877_2013_954_MOESM1_ESM.pdf]
